# Supplementary material for: Investigation on Flavescence Dorée in North-Western Italy Identifies Map-M54 (16SrV-D/Map-FD2) as the Only Phytoplasma Genotype in Vitis vinifera L. and Reveals the Presence of New Putative Reservoir Plants
Source: MDPI journal article supplement (doi:10.3390/biology12091216), 2023-09-07
Supplement: s1 [file s1]

**Table S1.** Position (coordinates) of monitored vineyards in Valtellina.

| Site | Latitude N  | Longitude E | Site | Latitude N  | Longitude E | Site | Latitude N  | Longitude E |
|------|-------------|-------------|------|-------------|-------------|------|-------------|-------------|
| V1   | 46° 10' 38" | 9° 41' 41"  | V14  | 46° 10' 26" | 9° 54' 05"  | V27  | 46° 10' 11" | 10° 00' 36" |
| V2   | 46° 10' 37" | 9° 41' 45"  | V15  | 46° 10' 26" | 9° 54' 12"  | V28  | 46° 10' 08" | 10° 00' 45" |
| V3   | 46° 10' 04" | 9° 47' 22"  | V16  | 46° 10' 30" | 9° 54' 25"  | V29  | 46° 10' 10" | 10° 00' 48" |
| V4   | 46° 10' 02" | 9° 49' 05"  | V17  | 46° 10' 23" | 9° 55' 21"  | V30  | 46° 10' 07" | 10° 00' 57" |
| V5   | 46° 10' 04" | 9° 49' 05"  | V18  | 46° 10' 27" | 9° 55' 32"  | V31  | 46° 09' 39" | 10° 03' 42" |
| V6   | 46° 10' 00" | 9° 49' 52"  | V19  | 46° 10' 29" | 9° 55' 46"  | V32  | 46° 10' 06" | 10° 03' 56" |
| V7   | 46° 10' 02" | 9° 50' 26"  | V20  | 46° 10' 35" | 9° 55' 57"  | V33  | 46° 09' 41" | 10° 02' 58" |
| V8   | 46° 09' 51" | 9° 50' 34"  | V21  | 46° 10' 39" | 9° 56' 54"  | V34  | 46° 09' 41" | 10° 03' 05" |
| V9   | 46° 10' 39" | 9° 52' 54"  | V22  | 46° 10' 39" | 9° 56' 55"  | V35  | 46° 09' 48" | 10° 04' 24" |
| V10  | 46° 10' 23" | 9° 53' 23"  | V23  | 46° 10' 39" | 9° 56' 57"  | V36  | 46° 11' 12" | 10° 06' 16" |
| V11  | 46° 09' 15" | 9° 50' 04"  | V24  | 46° 10' 10" | 10° 00' 32" | V37  | 46° 12' 12" | 10° 07' 42" |
| V12  | 46° 10' 45" | 9° 53' 26"  | V25  | 46° 10' 09" | 10° 00' 31" |      |             |             |
| V13  | 46° 10' 25" | 9° 53' 44"  | V26  | 46° 10' 07" | 10° 00' 39" |      |             |             |

**Table S2.** Position (coordinates) of monitored woody areas in Valtellina.

| Site | Latitude N  | Longitude E | Site | Latitude N  | Longitude E | Site | Latitude N  | Longitude E |
|------|-------------|-------------|------|-------------|-------------|------|-------------|-------------|
| W1   | 46° 10' 08" | 9° 46' 11"  | W6   | 46° 10' 28" | 9° 55' 31"  | W11  | 46° 09' 11" | 9° 59' 59"  |
| W2   | 46° 10' 14" | 9° 47' 13"  | W7   | 46° 09' 40" | 9° 59' 29"  | W12  | 46° 09' 21" | 9° 59' 59"  |
| W3   | 46° 10' 24" | 9° 47' 23"  | W8   | 46° 10' 28" | 9° 59' 34"  | W13  | 46° 10' 01" | 10° 00' 29" |
| W4   | 46° 09' 40" | 9° 48' 26"  | W9   | 46° 09' 26" | 9° 59' 36"  | W14  | 46° 10' 02" | 10° 00' 30" |
| W5   | 46° 09' 58" | 9° 50' 26"  | W10  | 46° 09' 44" | 9° 59' 55"  | W15  | 46° 10' 09" | 10° 00' 30" |

**Table S3.** 16SrV phytoplasma strains used in median-joining network analyses<sup>a</sup>.

| 16SrV phytoplasma strain                                                                                             | Map genotype | Acc. No. | Host <sup>b</sup>       | Country <sup>c</sup>       |
|----------------------------------------------------------------------------------------------------------------------|--------------|----------|-------------------------|----------------------------|
| FDp strains<br>(infecting grapevine and transmissible by <i>S. titanus</i> )                                         | M3 (FD3)     | AM384894 | Vv, Ag                  | IT                         |
|                                                                                                                      | M6 (FD3)     | AM384895 | Vv, Ag                  | IT                         |
|                                                                                                                      | M12 (FD3)    | AM384896 | Vv, Oi                  | IT, RS, CH                 |
|                                                                                                                      | M27 (FD1)    | AM384888 | Vv, St                  | FR                         |
|                                                                                                                      | M34 (FD1)    | AM384889 | Vv                      | FR                         |
|                                                                                                                      | M38 (FD2)    | LT221933 | Vv, Ag, St, Oa, Oi, Al, | IT, FR, DE, HU, RS, HR     |
|                                                                                                                      | M50 (FD1)    | AM384887 | Vv, Ag, Cv, St, Oa, Oi  | IT, FR, DE, HU, CH         |
|                                                                                                                      | M51 (FD3)    | FN811141 | Vv, Cv, Aa, St          | IT, HU, RS, ME, HR         |
|                                                                                                                      | M54 (FD2)    | AM384886 | Vv, Ca, St, Oi          | IT, FR, CH, HR             |
|                                                                                                                      | M89 (FD2)    | OL830376 | Vv                      | RS                         |
|                                                                                                                      | M112 (FD1)   | LT222007 | Vv                      | FR                         |
|                                                                                                                      | M119 (FD3)   | FN811142 | Cv                      | IT                         |
|                                                                                                                      | M121 (FD2)   | LT222016 | Vv, Oi, Al              | FR                         |
|                                                                                                                      | M122 (FD2)   | MG201984 | Vv, St                  | FR, HU, CH                 |
|                                                                                                                      | M144 (FD3)   | KJ911220 | Vv, Cv                  | RS                         |
|                                                                                                                      | M145 (FD3)   | KJ911221 | Cv                      | ME                         |
|                                                                                                                      | M148 (FD2)   | KJ605450 | Vv, Ag                  | RS, ME                     |
|                                                                                                                      | M150 (FD3)   | OL830381 | Vv                      | RS                         |
|                                                                                                                      | M151 (FD3)   | OL830379 | Vv                      | RS                         |
|                                                                                                                      | M152 (FD3)   | OL830377 | Vv                      | RS                         |
|                                                                                                                      | M153 (FD3)   | OL830368 | Vv                      | RS                         |
|                                                                                                                      | M154 (FD3)   | OL830370 | Vv                      | RS                         |
|                                                                                                                      | M155 (FD2)   | OL830366 | Vv                      | RS                         |
| FDp-related strains<br>(PGY-associated phytoplasma, infecting grapevine but non-transmissible by <i>S. titanus</i> ) | M36          | AM384885 | Vv, Ag                  | IT, FR                     |
|                                                                                                                      | M39          | LT221934 | Vv, Oa, Al              | FR, DE                     |
|                                                                                                                      | M40          | LT221935 | Vv, Oa,                 | FR, DE, ME                 |
|                                                                                                                      | M43          | AM384890 | Vv, Ag, Oa, Al          | FR, DE, HU, ME             |
|                                                                                                                      | M45          | LT221940 | Vv, Ag, Oa, Oi, Al,     | FR, DE                     |
|                                                                                                                      | M46          | AM384891 | Vv, Ag, Oa              | FR, DE                     |
|                                                                                                                      | M47          | LT221942 | Vv, Ag, Oa              | FR, DE, HU, CH             |
|                                                                                                                      | M48          | AM384893 | Vv, Ag, Oa, Al          | FR, DE                     |
|                                                                                                                      | M52          | LT221947 | Vv, Ag, Oa, Al          | FR, DE, HU, RS, MEO        |
|                                                                                                                      | M53          | AM384892 | Vv, Ag, Oa, Al          | IT, FR, DE, HU, RS, ME, HR |
| AldY-associated phytoplasma strains<br>(never reported in grapevine; found in alder and insects)                     | M1           | LT221896 | Ag                      | FR                         |
|                                                                                                                      | M2           | AM384897 | Ag                      | FR                         |
|                                                                                                                      | M4           | LT221899 | Ag                      | DE                         |
|                                                                                                                      | M5           | LT221900 | Ag                      | FR                         |
|                                                                                                                      | M7           | LT221902 | Ag                      | DE                         |
|                                                                                                                      | M8           | LT221903 | Ag                      | DE                         |
|                                                                                                                      | M9           | LT221904 | Ag                      | DE                         |
|                                                                                                                      | M10          | LT221905 | Ag                      | FR                         |
|                                                                                                                      | M11          | LT221906 | Ag                      | DE                         |
|                                                                                                                      | M13          | LT221908 | Ag, Al                  | FR, DE                     |
|                                                                                                                      | M14          | LT221909 | Ag, Oa, Al              | DE                         |
|                                                                                                                      | M15          | LT221910 | Ag                      | DE                         |
|                                                                                                                      | M16          | LT221911 | Oa                      | DE                         |
|                                                                                                                      | M17          | LT221912 | Ag                      | FR                         |
|                                                                                                                      | M18          | LT221913 | Ag                      | FR                         |
|                                                                                                                      | M19          | LT221914 | Ag                      | FR                         |
|                                                                                                                      | M20          | LT221915 | Ag                      | FR                         |
|                                                                                                                      | M21          | LT221916 | Oa                      | FR                         |
|                                                                                                                      | M22          | LT221917 | Ag                      | FR                         |
|                                                                                                                      | M23          | LT221918 | Ag                      | FR                         |

|                                                                                                     |     |          |            |                |
|-----------------------------------------------------------------------------------------------------|-----|----------|------------|----------------|
| AldY-associated phytoplasma strains<br>(never reported in grapevine;<br>found in alder and insects) | M24 | LT221919 | Ag         | FR             |
|                                                                                                     | M25 | LT221920 | Ag         | FR             |
|                                                                                                     | M26 | LT221921 | Ag         | FR             |
|                                                                                                     | M28 | LT221923 | Ag         | FR             |
|                                                                                                     | M29 | LT221924 | Ag         | FR             |
|                                                                                                     | M30 | LT221925 | Ag         | FR             |
|                                                                                                     | M31 | LT221926 | Ag         | FR             |
|                                                                                                     | M32 | LT221927 | Ag         | FR             |
|                                                                                                     | M33 | LT221928 | Ag         | FR             |
|                                                                                                     | M35 | AM384884 | Ag         | IT             |
|                                                                                                     | M36 | AM384885 | Ag         | IT             |
|                                                                                                     | M37 | FN561865 | Ag         | FR             |
|                                                                                                     | M41 | LT221936 | Ag, Oa     | FR             |
|                                                                                                     | M42 | LT221937 | Ag         | RS             |
|                                                                                                     | M44 | LT221939 | Ag, Oa     | FR, DE, HU, CH |
|                                                                                                     | M49 | LT221944 | Ag, Al     | FR, DE, RS     |
|                                                                                                     | M55 | LT221950 | Ag         | IT             |
|                                                                                                     | M56 | LT221951 | Ag         | IT             |
|                                                                                                     | M57 | LT221952 | Ag         | IT             |
|                                                                                                     | M58 | LT221953 | Ag         | HU             |
|                                                                                                     | M59 | LT221954 | Ag         | IT             |
|                                                                                                     | M61 | LT221956 | Ag         | IT             |
|                                                                                                     | M62 | LT221957 | Ag         | IT             |
|                                                                                                     | M63 | LT221958 | Oa         | HU             |
|                                                                                                     | M64 | LT221959 | Ag         | IT             |
|                                                                                                     | M65 | LT221960 | Ag         | IT             |
|                                                                                                     | M66 | LT221961 | Ag         | IT             |
|                                                                                                     | M67 | LT221962 | Ag         | IT             |
|                                                                                                     | M68 | LT221963 | Ag         | IT             |
|                                                                                                     | M69 | LT221964 | Ag         | IT             |
|                                                                                                     | M70 | LT221965 | Ag         | IT             |
|                                                                                                     | M71 | LT221966 | Ag         | IT             |
|                                                                                                     | M72 | LT221967 | Ag         | IT             |
|                                                                                                     | M73 | LT221968 | Ag         | IT             |
|                                                                                                     | M74 | LT221969 | Ag         | IT             |
|                                                                                                     | M75 | LT221970 | Ag         | IT             |
|                                                                                                     | M76 | LT221971 | Ag         | IT             |
|                                                                                                     | M77 | LT221972 | Ag         | IT             |
|                                                                                                     | M78 | LT221973 | Ag, Oa, Al | FR, DE, RS     |
|                                                                                                     | M79 | LT221974 | Ag         | DE             |
|                                                                                                     | M80 | LT221975 | Ag         | DE             |
|                                                                                                     | M81 | LT221976 | Ag         | DE             |
|                                                                                                     | M82 | LT221977 | Ag         | DE             |
|                                                                                                     | M83 | LT221978 | Ag         | DE             |
|                                                                                                     | M84 | LT221979 | Ag         | DE             |
|                                                                                                     | M85 | LT221980 | Ag         | DE             |
|                                                                                                     | M86 | LT221981 | Ag         | DE             |
|                                                                                                     | M87 | LT221982 | Ag         | DE             |
|                                                                                                     | M88 | LT221983 | Ag         | RS             |
|                                                                                                     | M89 | LT221984 | Ag         | RS             |
|                                                                                                     | M90 | LT221985 | Ag         | RS             |
|                                                                                                     | M91 | LT221986 | Ag         | RS             |
|                                                                                                     | M92 | LT221987 | Ag         | RS             |
|                                                                                                     | M93 | LT221988 | Ag         | RS             |
|                                                                                                     | M94 | LT221989 | Ag         | RS             |
|                                                                                                     | M95 | LT221990 | Ag         | RS             |

|                                                                                                     |      |          |        |        |
|-----------------------------------------------------------------------------------------------------|------|----------|--------|--------|
| AldY-associated phytoplasma strains<br>(never reported in grapevine;<br>found in alder and insects) | M96  | LT221991 | Ag     | RS     |
|                                                                                                     | M97  | LT221992 | Ag     | RS     |
|                                                                                                     | M98  | LT221993 | Ag     | RS     |
|                                                                                                     | M99  | LT221994 | Ag     | RS     |
|                                                                                                     | M100 | LT221995 | Ag     | IT     |
|                                                                                                     | M101 | LT221996 | Oa     | DE, RS |
|                                                                                                     | M102 | LT221997 | Ag     | RS     |
|                                                                                                     | M103 | LT221998 | Ag     | FR     |
|                                                                                                     | M104 | LT221999 | Ag     | FR     |
|                                                                                                     | M105 | LT222000 | Ag     | DE     |
|                                                                                                     | M106 | LT222001 | Ag     | FR     |
|                                                                                                     | M107 | LT222002 | Oa     | RS     |
|                                                                                                     | M108 | LT222003 | Oa     | FR     |
|                                                                                                     | M109 | LT222004 | Oa     | FR     |
|                                                                                                     | M110 | LT222005 | Oa     | FR     |
|                                                                                                     | M111 | LT222006 | Ag     | DE     |
|                                                                                                     | M113 | LT222008 | Ag     | IT     |
|                                                                                                     | M114 | LT222009 | Oa     | FR     |
|                                                                                                     | M115 | LT222010 | Oa     | FR     |
|                                                                                                     | M116 | LT222011 | Ag, Oa | FR, DE |
|                                                                                                     | M117 | LT222012 | Ag, Oa | FR, DE |
|                                                                                                     | M118 | LT222013 | Ag     | IT     |
|                                                                                                     | M120 | LT222015 | Oa     | DE     |
|                                                                                                     | M123 | LR585197 | Oa     | FR     |
|                                                                                                     | M124 | LR585198 | Oa     | DE     |
|                                                                                                     | M125 | LR585199 | Oi     | FR     |
|                                                                                                     | M126 | LR585200 | Oi     | FR     |
|                                                                                                     | M127 | LR585201 | Oi     | FR     |
|                                                                                                     | M129 | LR585202 | Oi     | FR     |
|                                                                                                     | M130 | LR585203 | Oi     | FR     |
|                                                                                                     | M131 | LR585204 | Oa     | DE     |
|                                                                                                     | M132 | LR585205 | Al     | FR     |
|                                                                                                     | M133 | LR585206 | Oa     | FR     |
|                                                                                                     | M135 | LR585207 | Oa     | DE     |
|                                                                                                     | M142 | KC188998 | Ag     | ME     |
|                                                                                                     | M143 | KC188999 | Ag     | ME     |
|                                                                                                     | M146 | KJ605448 | Ag     | MK     |
|                                                                                                     | M147 | KJ605449 | Ag     | MK     |
|                                                                                                     | M149 | KJ605451 | Ag     | MK     |
|                                                                                                     | M156 | OM654202 | Ag     | ME     |
|                                                                                                     | M157 | OM654205 | Ag     | ME     |

<sup>a</sup> Utilized data were retrieved from references [7–11,19,20] listed in the manuscript.

<sup>b</sup> Host acronyms: plants (Aa, *Ailanthus altissima*; Ag, *Alnus glutinosa*; Ca, *Corylus avellana*; Cv, *Clematis vitalba*; Vv, *Vitis vinifera*); insects (Al, *Allygus spp.*; Oa, *Oncopsis alni*; Oi, *Orientus idhidae*; St, *Scaphoideus titanus*).

<sup>c</sup> Country acronyms: CH (Switzerland), DE (Germany), FR (France), HR (Croatia), HU (Hungary), IT (Italy), ME (Montenegro), MK (North Macedonia), RS (Serbia).
